# Supplementary material for: Translating clinical and patient-reported data to tailored shared decision reports with predictive analytics for knee and hip arthritis
Source: Springer Nature journal article supplement (doi:10.1007/s11136-020-02557-8), 2020-06-19
Supplement: MOESM2 [file 18103614]

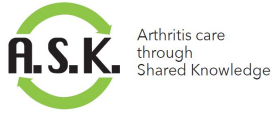

# Your Arthritis Profile

(based on your FORCE-TJR survey responses)

ID: 95521  
 Patient Name:  
 Latest Survey Date: 11/2/2018

## PAIN

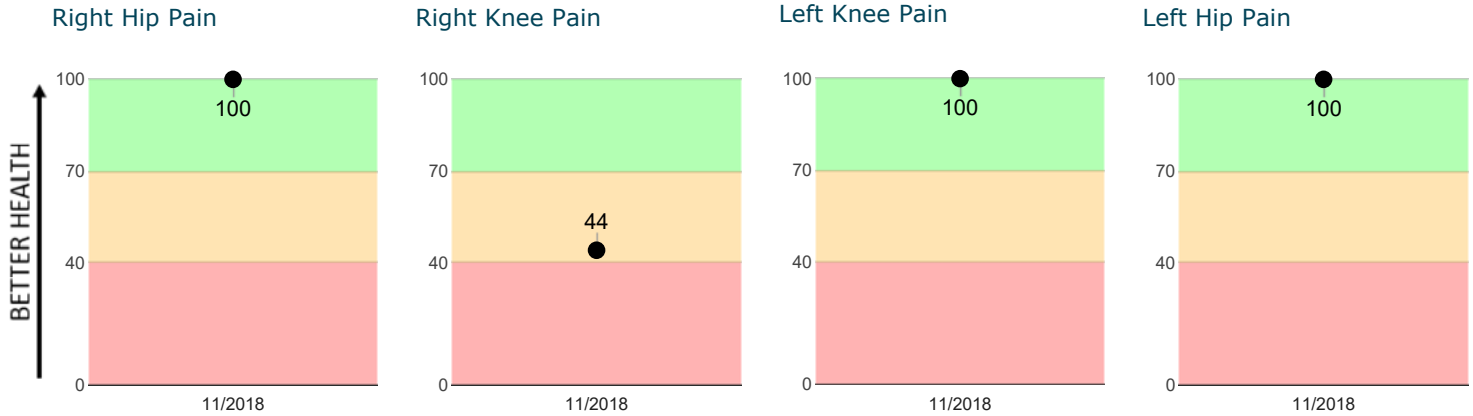

## FUNCTION AND PHYSICAL HEALTH

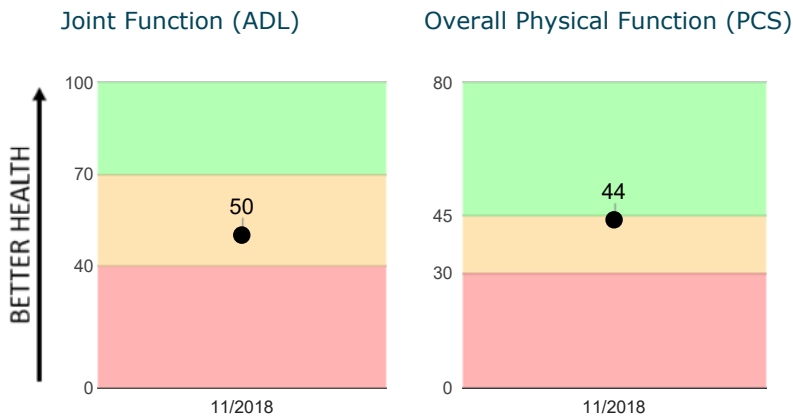

## DEFINITIONS AND INTERPRETATION

Pain and Function:  
**Green:** no or mild pain or limitations  
**Orange:** moderate pain or limitations  
 - discuss treatment options  
**Red:** severe pain or limitations  
 - surgery is common

Colors and definitions based on the FORCE-TJR nationally representative database

Source:  
 Pain and ADL values calculated from the HOOS/KOOS  
 PCS calculated from the VR-12

## FACTORS AFFECTING YOUR ARTHRITIS JOINT AND JOINT REPLACEMENT OUTCOMES

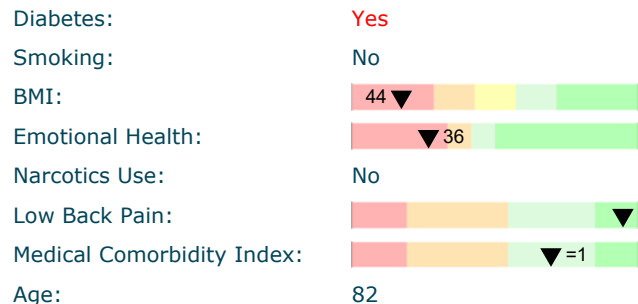

**You may be able to improve some of these factors. Please discuss with your surgeon.**

Low back Pain:  
**Green:** no pain  
**Light Green:** mild pain  
**Orange:** moderate pain  
**Red:** severe pain

BMI:  
**Green:** <25  
**Light Green:** 25-30  
**Yellow:** 30-35  
**Orange:** 35-40  
**Red:** >40

Medical Comorbidity Index:  
**Green:** =0  
**Light Green:** =1  
**Orange:** =2-5  
**Red:** >=6

Emotional Health:  
**Green (>50):** no limitations  
**Light Green (45-50):** mild limitations  
**Orange (40-45):** moderate limitations  
**Red (<40):** severe limitations

# Your Expected Outcomes Based on Patients Like You

(based on FORCE norms)

ID: 95521  
 Patient Name:  
 Latest Measure Date: 11/2/2018

## Patient's Likely Change in Pain, Function, and Physical Health After Surgery

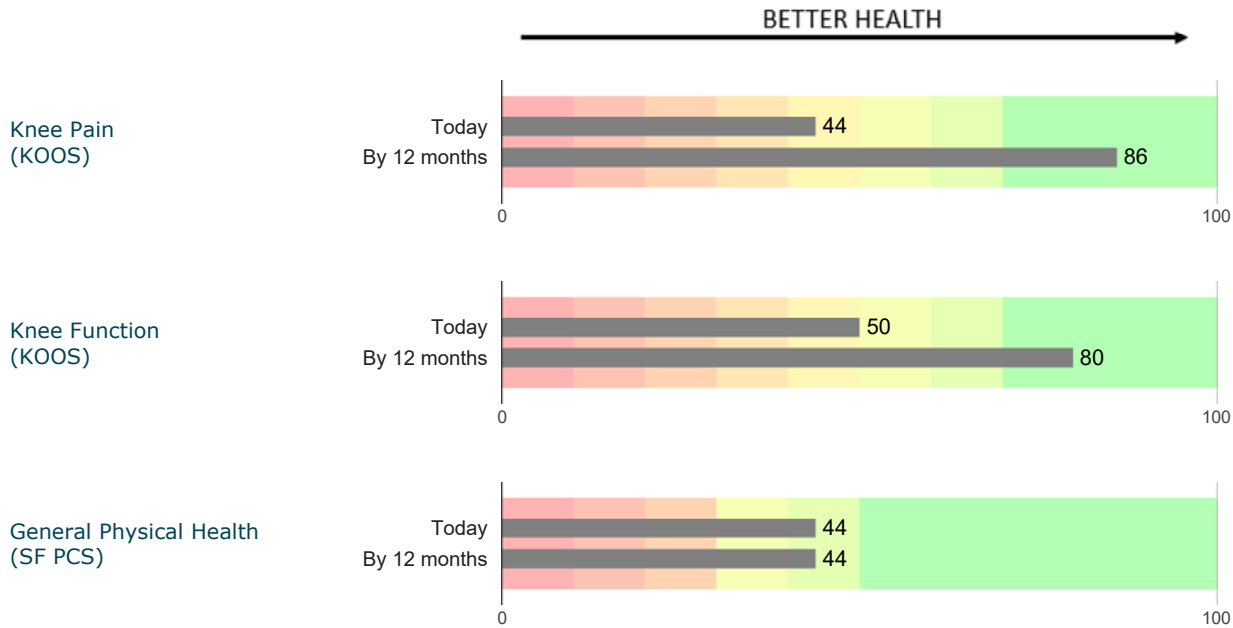

## Patient's Likely Pain with Activities of Daily Living After Surgery

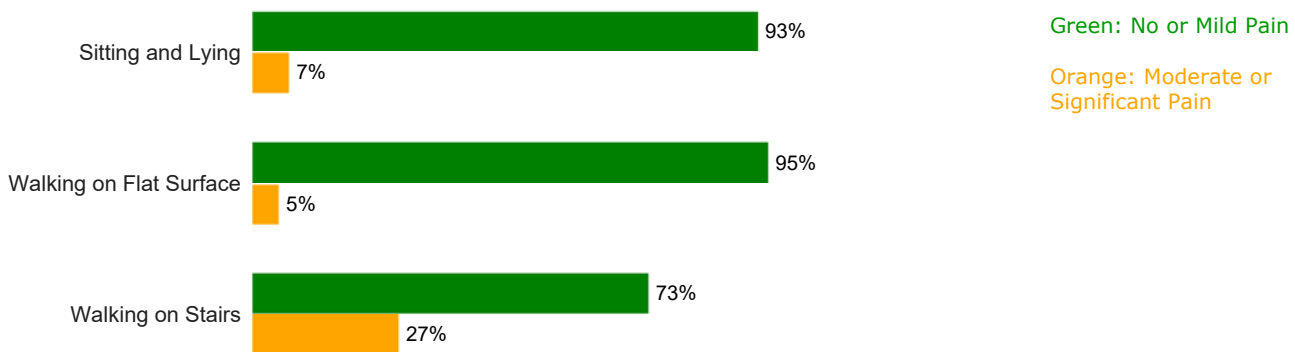

## Patient's Likely Need for Inpatient Care After Surgery

Need for hospital within 30 days      National rate: 2% - 8%

# Other Treatment Options

ID: 95521

Patient Name:

Latest Measure Date: 11/2/2018

## Osteoarthritis of the Knee

| Frequently asked questions                                                                                                                                                                                                                                | <b>Treatment Options Medications for Pain Relief</b><br>                  | <b>Treatment Options Joint injections (steroids)</b><br>                                              | <b>Treatment Options Physical Therapy</b><br>                                                       |
|-----------------------------------------------------------------------------------------------------------------------------------------------------------------------------------------------------------------------------------------------------------|------------------------------------------------------------------------------------------------------------------------------------------------------------|----------------------------------------------------------------------------------------------------------------------------------------------------------------------------------------|----------------------------------------------------------------------------------------------------------------------------------------------------------------------------------------|
| <b>Will this reduce the pain I have in my knee?</b>                                                                                                                                                                                                       | Ibuprofen (also known as Advil or Motrin) is helpful for 50 in every 100 patients.                                                                         | Some people get some relief of their pain and/or swelling after an injection.                                                                                                          | In a recent study, patients experienced good relief after participating in an intensive physical therapy program that lasted for 12 weeks.                                             |
| <b>Will this treatment help improve which activities I can manage to do?</b>                                                                                                                                                                              | As you get pain relief, you should be able to be more active.<br>Being more active can also help reduce your pain.                                         | If you get pain relief, you may be able to be more active.                                                                                                                             | As you get pain relief, you should be able to be more active. Most people are able to do more.<br>Being more active can also help reduce your pain.                                    |
| <b>Are there any risks to this treatment?</b>                                                                                                                                                                                                             | As with all medications, there are some side effects.<br>Ibuprofen can cause stomach pain and heartburn.<br>It can increase your risk of stomach bleeding. | You might feel slight pain at the injection site for a few days.<br>Allergic reactions and infections are rare.<br>There is a risk of cartilage damage if you get frequent injections. | You might feel sore for a few days as you begin your physical therapy.<br>In a recent study, very few people experienced any medical problems after participating in physical therapy. |
| <b>How long will it take me to feel better after the treatment?</b>                                                                                                                                                                                       | You may start having pain relief within a few days of when you start taking the medication.                                                                | Most people who get relief feel better within a week.                                                                                                                                  | It may take up to 4 weeks for you to feel better.                                                                                                                                      |
| <b>What are the outcomes for people with arthritis who have this treatment?</b>                                                                                                                                                                           | Many people cope well by using medications, being active and losing weight. Reducing your pain may help you get the benefits of exercise.                  | Some people have good relief when swelling and pain cause problems.                                                                                                                    | In a recent study, 74 of 100 people who participated in an intensive physical therapy program had not yet had knee replacement after 1 year.                                           |
| <b>How long will I need to continue this therapy?</b>                                                                                                                                                                                                     | You will need to stay on this medication until it is no longer working or you decide on another treatment.                                                 | You will need to continue this treatment until it is no longer working or you decide on another treatment.                                                                             | You will need to continue your PT exercises until it is no longer working or you decide on another treatment.                                                                          |
| <b>What is the cost for this treatment?</b>                                                                                                                                                                                                               | These are over the counter medications, so the full cost is yours.                                                                                         | This depends on your insurance and co-pay.                                                                                                                                             | This depends on your insurance and co-pay.                                                                                                                                             |
| <b>Important things to know</b>                                                                                                                                                                                                                           | You should discuss what pain relief medication might be right for you with your doctor.                                                                    | In recent studies, it is not clear whether injections are helpful or not. You should discuss whether this would be a good choice for you with your doctor.                             | You should discuss whether physical therapy would be a good choice for you with your doctor.                                                                                           |
| <b>Learn more</b>                                                                                                                                                                                                                                         | <a href="http://www.orthoquidelines.org/topic?id=1005">http://www.orthoquidelines.org/topic?id=1005</a>                                                    | <a href="https://medlineplus.gov/news/fullstory_165630.html">https://medlineplus.gov/news/fullstory_165630.html</a>                                                                    | <a href="http://www.nejm.org/doi/pdf/10.1056/NEJMoa1505467">http://www.nejm.org/doi/pdf/10.1056/NEJMoa1505467</a>                                                                      |
| Weight Loss can also be helpful in reducing pain and improving knee function. For each pound loss, you decrease the amount of pressure in your knee by 4 pounds. <b>If you lost 10 pounds, you would decrease the pressure on your knee by 40 pounds.</b> |                                                                                                                                                            |                                                                                                                                                                                        |                                                                                                                                                                                        |
